# Supplementary material for: Solid State Fermentation of Olive Leaves as a Promising Technology to Obtain Hydroxytyrosol and Elenolic Acid Derivatives Enriched Extracts
Source: MDPI journal article supplement (doi:10.3390/antiox11091693), 2022-08-29

**Table S1.** Analytical parameters of the method proposed. LOD: Limit of detection, LOQ: Limit of quantification.

| Analyte              | LOD    | LOQ    | Linear range<br>(mg L <sup>-1</sup> ) | Calibration curves (mg<br>L <sup>-1</sup> ) | r <sup>2</sup> |
|----------------------|--------|--------|---------------------------------------|---------------------------------------------|----------------|
| Hydroxytyrosol       | 0.0122 | 0.0407 | LOQ-100                               | y=76790x + 108991                           | 0.9977         |
| Oleuropein           | 0.0954 | 0.3179 | LOQ-100                               | y= 6615.7x + 9603.8                         | 0.9947         |
| Rutin                | 0.2366 | 0.7888 | LOQ-100                               | y= 3957.7x + 2144.5                         | 0.9970         |
| Apigenin-7-glucoside | 0.0229 | 0.0764 | LOQ-100                               | y= 40886x + 833.18                          | 0.9988         |
| Luteolin             | 0.0061 | 0.0203 | LOQ-100                               | y= 153477x + 4221.2                         | 0.9995         |

**Table S2.** Phenolic compounds tentatively identified in olive leaf extracts by HPLC-ESI-TOF-MS

|    | RT<br>(min) | m/z<br>experimental | m/z<br>calculated | Conf<br>(%) | Error<br>(ppm) | Molecular<br>formula | Compound                                                  | C | Aaw | Anig | AO5-<br>m | AO5-<br>s | AO8-<br>s | Ref.    |
|----|-------------|---------------------|-------------------|-------------|----------------|----------------------|-----------------------------------------------------------|---|-----|------|-----------|-----------|-----------|---------|
| 1  | 1.45        | 315.1074            | 315.1080          | 100         | -1.9           | C14H20O8             | Hydroxytyrosol-hexose                                     | X | X   | X    | X         | X         | X         | [1,2]   |
| 2  | 1.51        | 389.1064            | 389.1084          | 96.06       | -5.1           | C16H22O11            | Oleoside                                                  | X | X   | X    | X         | X         | X         | [1,2]   |
| 3  | 1.64        | 153.0546            | 153.0552          | 100         | -3.9           | C8H10O3              | Hydroxytyrosol                                            | X | X   | X    | X         | X         | X         | [1]     |
| 4  | 2.55        | 505.1552            | 505.1550          | 100.00      | -1.0           | C21H30O14            | Allobetonicoside                                          | X | -   | -    | -         | -         | -         | [3]     |
| 5  | 3.44        | 389.1076            | 389.1084          | 100         | -2.1           | C16H22O11            | Oleoside/secologanoside                                   | X | X   | X    | X         | X         | X         | [1,2]   |
| 6  | 3.58        | 305.0682            | 305.0661          | 58.17       | 6.9            | C15H14O7             | Galocatechin                                              | X | X   | X    | X         | X         | X         | Pubchem |
| 7  | 3.76        | 403.1233            | 403.1240          | 99.95       | -1.7           | C17H24O11            | Elenolic acid glucoside<br>isomer a                       | X | -   | -    | -         | -         | -         | [1,2]   |
| 8  | 4.62        | 403.1235            | 403.1240          | 99.95       | -1.2           | C17H24O11            | Elenolic acid glucoside<br>isomer b                       | X | X   | X    | X         | X         | X         | [1,2]   |
| 9  | 5.84        | 593.1494            | 593.1506          | 99.92       | -2.0           | C27H30O15            | Luteolin rutinoside isomer<br>a                           | X | X   | X    | X         | X         | X         | [1,2]   |
| 10 | 6.03        | 215.0918            | 215.0919          | 100         | -0.5           | C10H16O5             | Elenolic acid (EA)<br>derivative                          | X | X   | X    | X         | X         | X         | [4]     |
| 11 | 6.35        | 403.1230            | 403.1240          | 99.95       | -2.5           | C17H24O11            | Elenolic acid glucoside<br>isomer c                       | X | -   | -    | -         | -         | -         | [1,2]   |
| 12 | 6.59        | 571.1658            | 571.1663          | 100.00      | -0.9           | C25H32O15            | Dihydroxyoeluropein<br>isomer a                           | - | -   | X    | X         | X         | X         | [5]     |
| 13 | 6.72        | 609.1458            | 609.1456          | 99.79       | 0.3            | C27H30O16            | Luteolin-diglucoside<br>isomer a                          | X | X   | X    | X         | X         | X         | [1,2]   |
| 14 | 6.89        | 403.1240            | 403.1240          | 99.95       | -5.7           | C17H24O11            | Elenolic acid glucoside<br>isomer d                       | X | X   | X    | X         | X         | X         | [1,2]   |
| 15 | 7.04        | 639.1914            | 639.1925          | 99.81       | -1.7           | C29H36O16            | $\beta$ -Hydroxyverbascoside<br>[Campneoside II] isomer a | X | X   | X    | X         | X         | X         | [6]     |
| 16 | 7.19        | 639.1918            | 639.1925          | 99.99       | -1.1           | C29H36O16            | $\beta$ -Hydroxyverbascoside<br>[Campneoside II] isomer b | X | X   | X    | X         | X         | X         | [6]     |
| 17 | 7.52        | 403.1237            | 403.1240          | 99.95       | -0.7           | C17H24O11            | Elenolic acid glucoside<br>isomer e                       | X | X   | X    | X         | X         | X         | [1,2]   |

|    |      |          |          |        |      |           |                                                                 |   |   |   |   |   |   |         |
|----|------|----------|----------|--------|------|-----------|-----------------------------------------------------------------|---|---|---|---|---|---|---------|
| 18 | 7.63 | 243.0860 | 243.0869 | 100    | -3.7 | C11H16O6  | Hydrogenated-EA isomer a                                        | - | X | X | X | X | X | [4,7]   |
| 19 | 7.89 | 195.0650 | 195.0657 | 100    | -3.6 | C10H12O4  | Hydroxytyrosol acetate                                          | X | - | - | - | - | - | [8, 9]  |
| 20 | 8.08 | 243.0866 | 243.0869 | 100    | -1.2 | C11H16O6  | Hydrogenated-EA isomer b                                        | - | X | X | X | X | X | [4,7]   |
| 21 | 8.16 | 403.1222 | 403.1240 | 99.95  | -4.5 | C17H24O11 | Elenolic acid glucoside isomer f                                | X | X | X | X | X | X | [1,2]   |
| 22 | 8.21 | 609.1454 | 609.1456 | 100.00 | -0.3 | C27H30O16 | Luteolin-diglucoside isomer b                                   | X | X | X | X | X | X | [1,2]   |
| 23 | 8.35 | 525.1597 | 525.1608 | 99.99  | -2.1 | C24H30O13 | Demethyloleuropein isomer a                                     | X | X | X | X | X | X | [1,2]   |
| 24 | 8.61 | 609.1437 | 609.1456 | 99.99  | -3.1 | C27H30O16 | Rutin                                                           | X | - | - | X | X | X | [1,2]   |
| 25 | 8.71 | 555.1702 | 555.1714 | 100.00 | -2.2 | C25H32O14 | Hydroxyoleuropein isomer a                                      | X | X | X | X | X | X | [1]     |
| 26 | 8.79 | 555.1702 | 555.1714 | 100.00 | -2.2 | C25H32O14 | Hydroxyoleuropein isomer b                                      | X | X | X | X | X | X | [1]     |
| 27 | 9.05 | 593.1497 | 593.1506 | 99.99  | -1.5 | C27H30O15 | Luteolin rutinoside isomer b                                    | X | X | X | X | X | X | [1,2]   |
| 28 | 9.06 | 447.0918 | 447.0927 | 100.00 | -2.0 | C21H20O11 | Luteolin glucoside isomer a                                     | X | X | X | X | X | X | [1,2]   |
| 29 | 9.13 | 571.1663 | 571.1663 | 100.00 | 0.0  | C25H32O15 | Dihydroxyoleuropein isomer b                                    | - | - | - | X | X | X | [5]     |
| 30 | 9.26 | 701.2291 | 701.2293 | 99.63  | -0.3 | C31H42O18 | Oleuropein glucoside isomer a                                   | X | - | - | - | - | - | [1]     |
| 31 | 9.31 | 551.1769 | 551.1765 | 99.97  | 0.7  | C26H32O13 | 6-(3-Hydroxy-3-methylbutyl) taxifolin 7-O- $\beta$ -D-glucoside | - | - | X | X | X | X | Pubchem |
| 32 | 9.41 | 525.1605 | 525.1608 | 100.00 | -0.6 | C24H30O13 | Demethyloleuropein isomer b                                     | X | - | - | - | - | - | [1,2]   |
| 33 | 9.43 | 701.2292 | 701.2293 | 99.91  | -0.1 | C31H42O18 | Oleuropein glucoside isomer b                                   | X | - | - | - | - | - | [1]     |
| 34 | 9.58 | 593.1514 | 593.1506 | 99.77  | 1.3  | C27H30O15 | Luteolin rutinoside isomer c                                    | X | X | X | X | X | X | [1,2]   |
| 35 | 9.62 | 555.1723 | 555.1714 | 80.99  | 1.6  | C25H32O14 | Hydroxyoleuropein isomer c                                      | X | X | X | X | X | X | [1]     |
| 36 | 9.74 | 623.1990 | 623.1976 | 99.98  | 2.2  | C29H36O15 | Verbascoside isomer a                                           | X | X | X | X | X | X | [1,2]   |

|    |       |          |          |        |      |           |                                     |   |   |   |   |   |   |       |
|----|-------|----------|----------|--------|------|-----------|-------------------------------------|---|---|---|---|---|---|-------|
| 37 | 9.82  | 555.1725 | 555.1714 | 99.94  | 2.0  | C25H32O14 | Hydroxyoleuropein isomer d          | X | X | X | X | X | X | [1]   |
| 38 | 10.09 | 555.1732 | 555.1714 | 99.99  | 3.2  | C25H32O14 | Hydroxyoleuropein isomer e          | X | - | X | X | X | X | [1]   |
| 39 | 10.24 | 337.1285 | 337.1287 | 100    | -0.6 | C17H22O7  | Monohydrated oleacein               | - | X | X | X | X | X | [10]  |
| 40 | 10.35 | 323.1489 | 323.1495 | 100    | -1.9 | C17H24O6  | Hydroxytyrosol derivative           | - | X | X | X | X | X | [11]  |
| 41 | 10.42 | 577.1575 | 577.1557 | 99.95  | 3.1  | C27H30O14 | Apigenin rutinoside                 | X | X | X | X | X | X | [1,2] |
| 42 | 10.44 | 593.1505 | 593.1506 | 99.97  | -0.2 | C27H30O15 | Luteolin rutinoside isomer d        | X | X | X | X | X | X | [1,2] |
| 43 | 10.49 | 447.0915 | 447.0927 | 100.00 | -2.7 | C21H20O11 | Luteolin glucoside isomer b         | X | X | X | X | X | X | [1,2] |
| 44 | 10.55 | 623.1989 | 623.1976 | 99.90  | 2.1  | C29H36O15 | Verbascoside isomer b               | X | - | - | X | - | - | [1,2] |
| 45 | 10.64 | 431.0976 | 431.0978 | 100    | -0.5 | C21H20O10 | Apigenin glucoside                  | X | X | X | X | X | X | [1]   |
| 46 | 10.72 | 701.2292 | 701.2293 | 100.00 | -0.1 | C31H42O18 | Oleuropein glucoside isomer c       | X | - | - | - | - | - | [1]   |
| 47 | 10.84 | 555.1718 | 555.1714 | 99.96  | 0.7  | C25H32O14 | Hydroxyoleuropein isomer f          | X | X | X | X | X | X | [1]   |
| 48 | 10.86 | 701.2289 | 701.2293 | 99.98  | -0.6 | C31H42O18 | Oleuropein glucoside isomer d       | X | X | X | X | X | X | [1]   |
| 49 | 10.88 | 535.1810 | 535.1816 | 99.79  | -1.1 | C25H28O13 | Comselogoside                       | X | X | X | - | - | - | [4]   |
| 50 | 10.97 | 623.1968 | 623.1976 | 99.89  | -1.3 | C29H36O15 | Verbascoside isomer c               | - | X | - | - | - | - | [1,2] |
| 51 | 11.09 | 701.2301 | 701.2293 | 99.62  | 1.1  | C31H42O18 | Oleuropein glucoside isomer e       | X | X | X | X | X | X | [1]   |
| 52 | 11.35 | 321.1332 | 321.1338 | 100    | -1.9 | C17H22O6  | Lactone (ester with hydroxytyrosol) | - | X | X | X | X | X | [11]  |
| 53 | 11.44 | 701.2296 | 701.2293 | 99.99  | 0.4  | C31H42O18 | Oleuropein glucoside isomer f       | X | - | X | X | X | X | [1]   |
| 54 | 11.51 | 461.1085 | 461.1084 | 100    | 0.2  | C22H22O11 | Hydroxyoleuropein isomer g          | - | - | - | X | X | X | [1]   |
| 55 | 11.58 | 555.1704 | 555.1714 | 99.89  | -1.8 | C25H32O14 | Chrysoeriol-7-Oglucoside            | X | X | X | X | X | X | [1,2] |
| 56 | 11.63 | 447.0927 | 447.0927 | 99.97  | 0.0  | C21H20O11 | Luteolin glucoside isomer c         | X | X | X | X | X | X | [1,2] |
| 57 | 11.84 | 701.2300 | 701.2293 | 99.59  | 1.0  | C31H42O18 | Oleuropein glucoside isomer g       | X | X | X | X | X | X | [1]   |

|    |       |          |          |        |      |           |                                                                          |   |   |   |   |   |   |       |
|----|-------|----------|----------|--------|------|-----------|--------------------------------------------------------------------------|---|---|---|---|---|---|-------|
| 58 | 12.35 | 539.1770 | 539.1765 | 91.85  | 0.9  | C25H32O13 | Oleuropein isomer a                                                      | X | X | X | X | X | X | [1,2] |
| 59 | 12.43 | 541.1932 | 541.1921 | 99.99  | 2.0  | C25H34O13 | Hydro-oleuropein                                                         | X | X | X | X | X | X | [4]   |
| 60 | 12.56 | 539.1771 | 539.1765 | 98.15  | 1.1  | C25H32O13 | Oleuropein isomer b                                                      | X | X | X | X | X | X | [1,2] |
| 61 | 12.59 | 569.1874 | 569.1870 | 100.00 | 0.7  | C26H34O14 | 2"-Methoxyoleuropein isomer a                                            | X | - | - | - | X | - | [2]   |
| 62 | 12.76 | 569.1872 | 569.1870 | 100.00 | 0.4  | C26H34O14 | 2"-Methoxyoleuropein isomer b                                            | X | X | X | X | X | X | [2]   |
| 63 | 12.90 | 701.2292 | 701.2293 | 99.72  | -0.1 | C31H42O18 | Oleuropein glucoside isomer h                                            | X | X | X | X | X | X | [1]   |
| 64 | 13.01 | 539.1777 | 539.1765 | 100.00 | 2.2  | C25H32O13 | Oleuropein isomer c                                                      | X | X | X | X | X | X | [1,2] |
| 65 | 13.63 | 537.1608 | 537.1608 | 99.28  | 0.0  | C25H30O13 | Ligstroside aglycone glucuronide isomer a                                | X | X | X | X | X | X | [12]  |
| 66 | 13.90 | 537.1611 | 537.1608 | 99.92  | 0.6  | C25H30O13 | Ligstroside aglycone glucuronide isomer b                                | X | X | X | X | X | X | [12]  |
| 67 | 14.15 | 301.0341 | 301.0348 | 100    | -2.3 | C15H10O7  | Quercetin                                                                | X | X | X | X | X | X | [13]  |
| 68 | 14.21 | 539.1761 | 539.1765 | 100.00 | -0.7 | C25H32O13 | Oleuropein isomer d                                                      | X | X | X | X | X | X | [1,2] |
| 69 | 14.32 | 285.0399 | 285.0399 | 100    | 0.0  | C15H10O6  | Luteolin                                                                 | X | X | X | X | X | X | [1,2] |
| 70 | 14.47 | 701.2275 | 701.2293 | 99.98  | -2.6 | C31H42O18 | Oleuropein glucoside isomer i                                            | X | X | X | X | - | X | [1,2] |
| 71 | 14.66 | 701.2293 | 701.2293 | 100.00 | 0.0  | C31H42O18 | Oleuropein glucoside isomer j                                            | X | X | X | X | - | - | [1,2] |
| 72 | 14.86 | 539.1755 | 539.1765 | 100.00 | -1.9 | C25H32O13 | Oleuropein isomer e                                                      | X | X | X | X | X | X | [1]   |
| 73 | 15.14 | 537.1607 | 537.1608 | 98.40  | -0.2 | C25H30O13 | Ligstroside aglycone glucuronide isomer c                                | X | X | X | X | X | X | [12]  |
| 74 | 15.35 | 539.1761 | 539.1765 | 100.00 | -0.7 | C25H32O13 | Oleuropein isomer f                                                      | X | X | X | X | X | X | [1]   |
| 75 | 15.47 | 583.2034 | 583.2027 | 100.00 | 1.2  | C27H36O14 | Lucidumoside C isomer a                                                  | - | - | - | - | - | - | [5]   |
| 76 | 15.59 | 557.2231 | 557.2234 | 99.97  | -0.5 | C26H38O13 | 6'-O-[(2E)-2,6-Dimethyl-8-hydroxy-2-octenoyloxy] secologanoside isomer a | X | X | X | X | X | X | [8]   |
| 77 | 15.63 | 583.2036 | 583.2027 | 99.98  | 1.5  | C27H36O14 | Lucidumoside C isomer b                                                  | X | - | - | - | - | - | [5]   |
| 78 | 15.77 | 523.1822 | 523.1816 | 99.99  | 1.1  | C25H32O12 | Ligstroside                                                              | X | X | X | X | X | X | [1,2] |

|    |       |          |          |        |      |           |                                                                          |   |   |   |   |   |   |       |
|----|-------|----------|----------|--------|------|-----------|--------------------------------------------------------------------------|---|---|---|---|---|---|-------|
| 79 | 15.85 | 539.1777 | 539.1765 | 99.25  | 2.2  | C25H32O13 | Oleuropein isomer g                                                      | X | X | X | X | X | X | [1,2] |
| 80 | 16.04 | 377.1232 | 377.1236 | 100    | -1.1 | C19H22O8  | Oleuropein aglycone                                                      | X | X | X | X | X | X | [13]  |
| 81 | 16.13 | 601.2128 | 601.2132 | 99.99  | -0.7 | C27H38O15 | Frameroside/2"-epi-frameroside                                           | X | X | X | X | X | X | [14]  |
| 82 | 16.20 | 553.1922 | 553.1921 | 99.73  | 0.2  | C26H34O13 | Oleuroside methyl ether isomer a                                         | X | X | - | - | - | - | [1]   |
| 83 | 16.37 | 623.1405 | 623.1401 | 100.00 | 0.6  | C31H28O14 | Luteolin derivative                                                      | X | X | - | X | - | X | [4]   |
| 84 | 16.92 | 583.2041 | 583.2027 | 99.99  | 2.4  | C27H36O14 | Lucidumoside C isomer c                                                  | X | - | - | - | - | - | [5]   |
| 85 | 17.56 | 553.1924 | 553.1921 | 100.00 | 0.5  | C26H34O13 | Oleuroside methyl ether isomer b                                         | X | X | X | X | X | X | [1]   |
| 86 | 17.64 | 557.2236 | 557.2234 | 99.99  | 0.4  | C26H38O13 | 6'-O-[(2E)-2.6-Dimethyl-8-hydroxy-2-octenoyloxy] secologanoside isomer b | X | X | X | X | X | X | [8]   |
| 87 | 17.98 | 299.0553 | 299.0556 | 100    | -1.0 | C16H12O6  | Diosmetin                                                                | X | X | X | X | X | X | [4]   |
| 88 | 18.73 | 539.1765 | 539.1765 | 100.00 | 0.0  | C25H32O13 | Oleuropein isomer h                                                      | X | - | - | - | - | - | [1,2] |
| 89 | 18.79 | 539.1776 | 539.1765 | 99.30  | 2.0  | C25H32O13 | Oleuropein isomer i                                                      | X | - | - | - | - | - | [1,2] |
| 90 | 18.84 | 539.1780 | 539.1765 | 99.98  | 2.8  | C25H32O13 | Oleuropein isomer j                                                      | X | - | - | - | - | - | [1,2] |
| 91 | 18.89 | 377.1228 | 377.1236 | 100    | -2.1 | C19H22O8  | Oleuropein aglycone                                                      | X | X | X | X | X | X | [13]  |
| 92 | 18.99 | 539.1769 | 539.1765 | 100.00 | 0.7  | C25H32O13 | Oleuropein isomer k                                                      | X | - | - | - | - | - | [1,2] |
| 93 | 19.12 | 613.1921 | 613.1921 | 99.74  | 0.0  | C31H34O13 | Resinoside isomer a                                                      | X | X | X | X | X | X | [1]   |
| 94 | 19.40 | 613.1924 | 613.1921 | 99.98  | 0.5  | C31H34O13 | Resinoside isomer b                                                      | X | X | X | X | X | X | [1]   |
| 95 | 21.57 | 707.2899 | 707.2915 | 99.94  | -2.3 | C35H48O15 | Oleuropein derivative                                                    | X | X | X | X | X | X | [5]   |
| 96 | 22.69 | 303.1226 | 303.1232 | 100    | -2.0 | C17H20O5  | Oleocanthal (p-HPEA-EDA)                                                 | - | X | X | X | X | X | [4]   |

1. Martín-García B et al. DOI: 10.1016/j.indcrop.2020.112741
2. Talhaoui N et al. DOI: 10.1016/j.lwt.2014.03.014.
3. Cádiz-Gurrea ML et al. DOI: 10.3390/antiox10020245
4. Abbattista R et al. DOI: 10.3390/foods10061236

5. Contreras MM et al. DOI: 10.3390/foods10010111
6. Cardinali A. et al. DOI: 10.1021/jf204001p
7. Silva S. et al. DOI: 10.1002/mnfr.201700065
8. Quirantes-Piné R et al. DOI: 10.1002/pca.2401
9. Kritikou E et al. DOI: 10.3390/molecules25214889
10. Ventura G et al. DOI: 10.1002/rcm.8514
11. Garcia-Aloy M et al. DOI: 10.3390/metabo11100692
12. Dias MC et al. DOI: 10.1016/j.phytochem.2019.112199.
13. Olmo-García L et al. DOI:10.3390/molecules23102524
14. Sidda JD et al. DOI: 10.1038/s41598-020-76140-z

**Table S3.** Content of phenolic compounds in olive leaf extracts (mg/g d.w. leaf)

| Phenolic compound |                                                         | Control |        | Aaw   |         | Anig   |        | AO5-m |        | AO5-s |         | AO8-s |        |
|-------------------|---------------------------------------------------------|---------|--------|-------|---------|--------|--------|-------|--------|-------|---------|-------|--------|
|                   |                                                         | Mean    | SD     | Mean  | SD      | Mean   | SD     | Mean  | SD     | Mean  | SD      | Mean  | SD     |
| 1                 | Hydroxytyrosol-hexose                                   | 0.46    | 0.01   | 0.09  | 0.004   | 0.23   | 0.003  | 0.04  | 0.002  | 0.002 | 0.00003 | 0.04  | 0.001  |
| 2                 | Oleoside                                                | 0.22    | 0.01   | 0.25  | 0.005   | 0.18   | 0.001  | 0.23  | 0.001  | 0.19  | 0.01    | 0.23  | 0.01   |
| 3                 | Hydroxytyrosol                                          | 0.53    | 0.01   | 0.68  | 0.004   | 0.63   | 0.02   | 0.48  | 0.02   | 0.19  | 0.01    | 0.26  | 0.01   |
| 4                 | Allobetonicoside                                        | 0.09    | 0.01   |       |         |        |        |       |        |       |         |       |        |
| 5                 | Secologanoside                                          | 0.37    | 0.0001 | 0.41  | 0.02    | 0.34   | 0.001  | 0.38  | 0.001  | 0.29  | 0.02    | 0.36  | 0.04   |
| 6                 | Galocatechin                                            | 0.56    | 0.02   | 0.68  | 0.03    | 0.62   | 0.002  | 0.63  | 0.02   | 0.61  | 0.01    | 0.59  | 0.01   |
| 7                 | Elenolic acid glucoside isomer a                        |         |        |       |         |        |        |       |        |       |         |       |        |
| 8                 | Elenolic acid glucoside isomer b                        | 0.08    | 0.004  | 0.13  | 0.01    | 0.13   | 0.001  | 0.15  | 0.003  | 0.18  | 0.01    | 0.21  | 0.01   |
| 9                 | Luteolin rutinoside isomer a                            | 0.09    | 0.01   | 0.10  | 0.004   | 0.09   | 0.001  | 0.09  | 0.01   | 0.10  | 0.001   | 0.09  | 0.003  |
| 10                | Elenolic acid (EA) derivative                           | 0.15    | 0.01   | 0.30  | 0.005   | 0.34   | 0.01   | 0.24  | 0.01   | 0.37  | 0.003   | 0.24  | 0.0002 |
| 12                | Dihydroxyoleuropein isomer I                            |         |        |       |         | 0.33   | 0.01   | 0.36  | 0.01   | 0.41  | 0.04    | 0.46  | 0.06   |
| 13                | Luteolin-diglucoside isomer a                           | 0.17    | 0.01   | 0.09  | 0.01    | 0.10   | 0.002  | 0.11  | 0.01   | 0.08  | 0.01    | 0.14  | 0.01   |
| 14                | Elenolic acid glucoside isomer c                        | 0.19    | 0.01   | 0.20  | 0.01    | 0.16   | 0.003  | 0.18  | 0.002  | 0.10  | 0.01    | 0.16  | 0.004  |
| 15                | $\beta$ -Hydroxyverbascoside [Campneoside II] isomer I  | 0.24    | 0.01   | 0.29  | 0.03    | 0.33   | 0.01   | 0.18  | 0.004  | 0.30  | 0.01    | 0.24  | 0.002  |
| 16                | $\beta$ -Hydroxyverbascoside [Campneoside II] isomer II | 0.26    | 0.02   | 0.30  | 0.01    | 0.31   | 0.01   | 0.17  | 0.002  | 0.29  | 0.001   | 0.26  | 0.002  |
| 17                | Elenolic acid glucoside isomer d                        |         |        | 0.01  | 0.004   | 0.0029 | 0.0003 | 0.01  | 0.001  | 0.02  | 0.0002  | 0.01  | 0.0004 |
| 18                | Hydrogenated-EA isomer a                                |         |        | 0.08  | 0.003   | 0.08   | 0.003  | 0.25  | 0.002  | 0.18  | 0.02    | 0.14  | 0.0002 |
| 19                | Hydroxytyrosol acetate                                  | 0.85    | 0.01   |       |         |        |        |       |        |       |         |       |        |
| 20                | Hydrogenated-EA isomer b                                |         |        | 0.33  | 0.01    | 0.32   | 0.003  | 0.39  | 0.01   | 0.38  | 0.02    | 0.30  | 0.005  |
| 22                | Luteolin-diglucoside isomer b                           | 0.08    | 0.01   | 0.07  | 0.002   | 0.07   | 0.001  | 0.06  | 0.01   | 0.06  | 0.004   | 0.06  | 0.01   |
| 23                | Demethyloleuropein isomer a                             |         |        | 0.01  | 0.00004 | 0.0035 | 0.0004 | 0.01  | 0.0004 |       |         | 0.02  | 0.0003 |
| 24                | Rutin                                                   | 0.10    | 0.002  | 0.002 | 0.001   |        |        | 0.06  | 0.001  | 0.06  | 0.002   | 0.07  | 0.001  |
| 25                | Hydroxyoleuropein isomer a                              | 0.40    | 0.01   | 0.43  | 0.01    | 0.38   | 0.004  | 0.11  | 0.01   | 0.16  | 0.01    | 0.19  | 0.001  |



|    |                                     |      |        |      |        |      |         |       |       |       |       |       |         |
|----|-------------------------------------|------|--------|------|--------|------|---------|-------|-------|-------|-------|-------|---------|
| 26 | Hydroxyoleuropein isomer b          | 0.41 | 0.01   | 0.47 | 0.004  | 0.40 | 0.01    | 0.14  | 0.01  | 0.18  | 0.01  | 0.22  | 0.001   |
| 27 | Luteolin rutinoside isomer b        | 0.08 | 0.002  | 0.02 | 0.004  | 0.09 | 0.0002  | 0.10  | 0.003 | 0.11  | 0.004 | 0.09  | 0.01    |
| 28 | Luteolin glucoside isomer a         | 0.61 | 0.01   | 0.55 | 0.01   | 0.49 | 0.01    | 0.45  | 0.01  | 0.47  | 0.01  | 0.43  | 0.05    |
| 29 | Dihydroxyoleuropein isomer II       |      |        |      |        |      |         | 0.21  | 0.004 | 0.12  | 0.002 | 0.16  | 0.005   |
| 33 | Oleuropein glucoside isomer a       |      |        |      |        |      |         |       |       |       |       |       |         |
| 34 | Luteolin rutinoside isomer c        | 0.10 | 0.001  | 0.07 | 0.002  | 0.10 | 0.001   | 0.13  | 0.002 | 0.13  | 0.003 | 0.11  | 0.0004  |
| 35 | Hydroxyoleuropein isomer c          | 0.12 | 0.002  | 0.17 | 0.005  | 0.16 | 0.004   | 0.04  | 0.003 | 0.06  | 0.01  | 0.08  | 0.001   |
| 36 | Verbascoside isomer a               | 0.88 | 0.003  | 0.81 | 0.01   | 0.75 | 0.01    | 0.91  | 0.03  | 0.71  | 0.002 | 0.78  | 0.04    |
| 37 | Hydroxyoleuropein isomer d          | 0.12 | 0.001  | 0.14 | 0.005  | 0.14 | 0.001   | 0.05  | 0.004 | 0.07  | 0.01  | 0.09  | 0.004   |
| 38 | Hydroxyoleuropein isomer e          | 0.01 | 0.002  |      |        | 0.16 | 0.002   | 0.21  | 0.01  | 0.16  | 0.01  | 0.21  | 0.002   |
| 39 | Monohydrated oleacein               |      |        | 0.09 | 0.001  | 0.08 | 0.001   | 0.25  | 0.01  | 0.10  | 0.002 | 0.17  | 0.002   |
| 40 | Hydroxytyrosol derivative           |      |        | 0.42 | 0.01   | 0.83 | 0.02    | 1.51  | 0.22  | 0.54  | 0.01  | 0.93  | 0.000   |
| 41 | Apigenin rutinoside                 | 0.17 | 0.002  | 0.06 | 0.01   | 0.16 | 0.0009  | 0.16  | 0.003 | 0.17  | 0.003 | 0.15  | 0.02    |
| 42 | Luteolin rutinoside isomer d        | 0.02 | 0.0001 | 0.02 | 0.0003 | 0.03 | 0.0003  | 0.02  | 0.002 | 0.03  | 0.002 | 0.03  | 0.002   |
| 43 | Luteolin glucoside isomer b         | 0.34 | 0.02   | 0.35 | 0.01   | 0.32 | 0.01    | 0.31  | 0.01  | 0.31  | 0.01  | 0.33  | 0.01    |
| 44 | Verbascoside isomer b               | 0.38 | 0.003  |      |        |      |         |       |       |       |       |       |         |
| 45 | Apigenin glucoside                  | 0.18 | 0.01   | 0.34 | 0.004  | 0.18 | 0.0016  | 0.16  | 0.01  | 0.15  | 0.01  | 0.16  | 0.02    |
| 46 | Oleuropein glucoside isomer b       |      |        |      |        |      |         |       |       |       |       |       |         |
| 47 | Hydroxyoleuropein isomer f          | 0.03 | 0.004  | 0.03 | 0.002  | 0.03 | 0.00004 | 0.005 | 0.001 | 0.01  | 0.002 | 0.007 | 0.0001  |
| 48 | Oleuropein glucoside isomer c       | 0.02 | 0.001  |      |        | 0.03 | 0.001   | 0.01  | 0.003 |       |       | 0.02  | 0.0001  |
| 49 | Comselogoside                       | 0.02 | 0.0001 | 0.03 | 0.002  | 0.01 | 0.0003  |       |       |       |       |       |         |
| 50 | Verbascoside isomer c               |      |        |      |        |      |         |       |       |       |       |       |         |
| 51 | Oleuropein glucoside isomer d       | 0.02 | 0.002  | 0.02 | 0.005  | 0.03 | 0.0002  | 0.02  | 0.004 | 0.001 | 0.002 | 0.03  | 0.00001 |
| 52 | Lactone (ester with hydroxytyrosol) |      |        | 0.98 | 0.06   | 0.59 | 0.0007  | 0.93  | 0.10  | 0.26  | 0.01  | 0.55  | 0.01    |
| 53 | Oleuropein glucoside isomer e       | 0.06 | 0.0005 |      |        | 0.03 | 0.0026  |       |       |       |       | 0.002 | 0.00003 |
| 54 | Hydroxyoleuropein isomer g          |      |        |      |        |      |         |       |       | 0.01  | 0.003 | 0.01  | 0.0001  |
| 55 | Chrysoeriol-7-Oglucoside            | 0.29 | 0.01   | 0.36 | 0.002  | 0.29 | 0.003   | 0.29  | 0.01  | 0.28  | 0.01  | 0.29  | 0.02    |
| 56 | Luteolin glucoside isomer c         | 0.20 | 0.02   | 0.27 | 0.002  | 0.26 | 0.01    | 0.25  | 0.004 | 0.29  | 0.002 | 0.28  | 0.01    |

|    |                                                                          |        |         |      |        |        |        |      |        |      |       |      |        |
|----|--------------------------------------------------------------------------|--------|---------|------|--------|--------|--------|------|--------|------|-------|------|--------|
| 57 | Oleuropein glucoside isomer f                                            | 0.16   | 0.002   | 0.02 | 0.001  | 0.11   | 0.004  | 0.02 | 0.003  | 0.04 | 0.01  | 0.07 | 0.0005 |
| 58 | Oleuropein isomer a                                                      |        |         | 0.05 | 0.001  | 0.03   | 0.001  | 0.05 | 0.003  | 0.02 | 0.003 | 0.05 | 0.0001 |
| 59 | Hydrooleuropein                                                          | 0.0009 | 0.00001 | 0.01 | 0.003  | 0.01   | 0.002  | 0.02 | 0.001  |      |       | 0.01 | 0.0001 |
| 60 | Oleuropein isomer b                                                      | 0.03   | 0.002   | 0.07 | 0.005  | 0.05   | 0.001  | 0.07 | 0.003  | 0.04 | 0.004 | 0.07 | 0.001  |
| 61 | 2"-Methoxyoleuropein isomer a                                            |        |         |      |        |        |        |      |        |      |       |      |        |
| 62 | 2"-Methoxyoleuropein isomer b                                            |        |         |      |        |        |        |      |        |      |       |      |        |
| 63 | Oleuropein glucoside isomer g                                            | 0.59   | 0.01    | 0.14 | 0.06   | 0.33   | 0.01   | 0.16 | 0.01   | 0.18 | 0.03  | 0.27 | 0.04   |
| 64 | Oleuropein isomer c                                                      | 2.06   | 0.03    | 2.52 | 0.03   | 1.94   | 0.02   | 2.27 | 0.08   | 1.80 | 0.12  | 2.38 | 0.06   |
| 65 | Ligstroside aglycone glucuronide isomer a                                | 0.07   | 0.0005  | 0.05 | 0.002  | 0.08   | 0.002  | 0.06 | 0.001  | 0.08 | 0.000 | 0.08 | 0.0002 |
| 66 | Ligstroside aglycone glucuronide isomer b                                | 0.13   | 0.003   | 0.16 | 0.01   | 0.14   | 0.01   | 0.14 | 0.01   | 0.15 | 0.002 | 0.15 | 0.0004 |
| 67 | Quercetin                                                                |        |         | 0.07 | 0.001  | 0.05   | 0.01   |      |        | 0.01 | 0.004 |      |        |
| 68 | Oleuropein isomer d                                                      | 0.22   | 0.01    | 0.31 | 0.0004 | 0.26   | 0.01   | 0.30 | 0.01   | 0.26 | 0.01  | 0.33 | 0.01   |
| 69 | Luteolin                                                                 | 0.04   | 0.03    | 0.55 | 0.01   | 0.33   | 0.02   | 0.45 | 0.02   | 0.57 | 0.01  | 0.36 | 0.004  |
| 70 | Oleuropein glucoside isomer h                                            | 0.02   | 0.002   |      |        |        |        |      |        |      |       |      |        |
| 71 | Oleuropein glucoside isomer i                                            | 0.002  | 0.001   |      |        | 0.0007 | 0.0002 |      |        |      |       |      |        |
| 72 | Oleuropein isomer e                                                      | 1.09   | 0.02    | 1.34 | 0.01   | 0.94   | 0.01   | 1.43 | 0.03   | 0.91 | 0.05  | 1.22 | 0.13   |
| 73 | Ligstroside aglycone glucuronide isomer c                                | 0.20   | 0.01    | 0.17 | 0.001  | 0.20   | 0.003  | 0.13 | 0.003  | 0.16 | 0.003 | 0.18 | 0.002  |
| 74 | Oleuropein isomer f                                                      | 0.10   | 0.0003  | 0.10 | 0.001  | 0.09   | 0.004  | 0.14 | 0.001  | 0.08 | 0.005 | 0.11 | 0.0003 |
| 75 | Lucidumoside C isomer a                                                  |        |         |      |        |        |        |      |        |      |       |      |        |
| 76 | 6'-O-[(2E)-2,6-Dimethyl-8-hydroxy-2-octenoyloxy] secologanoside isomer I | 0.003  | 0.001   | 0.03 | 0.001  | 0.02   | 0.0009 | 0.03 | 0.004  | 0.04 | 0.002 | 0.03 | 0.0002 |
| 77 | Lucidumoside C isomer b                                                  |        |         |      |        |        |        |      |        |      |       |      |        |
| 78 | Ligstroside isomer b                                                     | 0.01   | 0.0002  | 0.04 | 0.003  | 0.02   | 0.0008 | 0.04 | 0.0002 | 0.03 | 0.004 | 0.06 | 0.003  |
| 79 | Oleuropein isomer g                                                      | 0.07   | 0.0007  | 0.07 | 0.0002 | 0.05   | 0.0004 | 0.11 | 0.0004 | 0.05 | 0.005 | 0.08 | 0.001  |
| 80 | Oleuropein aglycone isomer a                                             | 0.05   | 0.003   | 0.06 | 0.0001 | 0.04   | 0.002  | 0.06 | 0.0007 | 0.03 | 0.004 | 0.04 | 0.000  |

|    |                                                                           |       |       |       |       |       |       |       |       |       |        |       |         |
|----|---------------------------------------------------------------------------|-------|-------|-------|-------|-------|-------|-------|-------|-------|--------|-------|---------|
| 81 | Frameroside                                                               | 0.19  | 0.01  | 0.32  | 0.01  | 0.28  | 0.01  | 0.27  | 0.01  | 0.31  | 0.02   | 0.36  | 0.003   |
| 84 | Lucidumoside C isomer c                                                   |       |       |       |       |       |       |       |       |       |        |       |         |
| 86 | 6'-O-[(2E)-2,6-Dimethyl-8-hydroxy-2-octenoyloxy] secologanoside isomer II | 0.001 | 0.002 | 0.015 | 0.001 | 0.004 | 0.003 | 0.02  | 0.004 | 0.03  | 0.001  | 0.02  | 0.00001 |
| 88 | Oleuropein isomer h                                                       |       |       |       |       |       |       |       |       |       |        |       |         |
| 89 | Oleuropein isomer i                                                       |       |       |       |       |       |       |       |       |       |        |       |         |
| 90 | Oleuropein isomer j                                                       |       |       |       |       |       |       |       |       |       |        |       |         |
| 91 | Oleuropein aglycone isomer b                                              | 0.56  | 0.03  | 0.01  | 0.001 | 0.04  | 0.01  | 0.11  | 0.01  | 0.22  | 0.02   | 0.10  | 0.002   |
| 92 | Oleuropein isomer k                                                       |       |       |       |       |       |       |       |       |       |        |       |         |
| 93 | Resinoside isomer a                                                       | 0.08  | 0.01  | 0.13  | 0.004 | 0.095 | 0.001 | 0.09  | 0.001 | 0.10  | 0.0001 | 0.09  | 0.002   |
| 94 | Resinoside isomer b                                                       | 0.03  | 0.004 | 0.04  | 0.001 | 0.025 | 0.002 | 0.03  | 0.001 | 0.03  | 0.001  | 0.03  | 0.001   |
| 95 | Oleuropein derivative                                                     |       |       | 0.17  | 0.002 | 0.015 | 0.002 |       |       | 0.01  | 0.003  |       |         |
| 96 | Oleocanthal (p-HPEA-EDA)                                                  |       |       | 0.03  | 0.004 |       |       |       |       |       |        |       |         |
|    | <b>Simple phenols</b>                                                     | 1.84  | 0.01  | 2.16  | 0.06  | 2.24  | 0.04  | 2.96  | 0.34  | 0.99  | 0.01   | 1.79  | 0.00    |
|    | <b>Elenolic acid derivatives</b>                                          | 0.42  | 0.02  | 1.05  | 0.04  | 1.04  | 0.01  | 1.21  | 0.001 | 1.22  | 0.01   | 1.06  | 0.01    |
|    | <b>Flavonoids</b>                                                         | 3.15  | 0.14  | 3.79  | 0.06  | 3.29  | 0.07  | 3.40  | 0.23  | 3.56  | 0.02   | 3.30  | 0.13    |
|    | <b>Secoiridoids</b>                                                       | 7.37  | 0.11  | 7.71  | 0.17  | 6.95  | 0.02  | 7.46  | 0.21  | 6.20  | 0.37   | 7.77  | 0.44    |
|    | <b>Iridoids</b>                                                           | 0.09  | 0.01  |       |       |       |       |       |       |       |        |       |         |
|    | <b>Other phenolic compounds</b>                                           | 1.76  | 0.03  | 1.40  | 0.03  | 1.39  | 0.01  | 1.26  | 0.04  | 1.31  | 0.01   | 1.28  | 0.04    |
|    | <b>Total phenols</b>                                                      | 14.64 | 0.07  | 16.12 | 0.24  | 14.91 | 0.03  | 16.30 | 0.59  | 13.29 | 0.38   | 15.20 | 0.61    |

Missing values are < LOQ

**Figure S1. PLS-DA analysis**

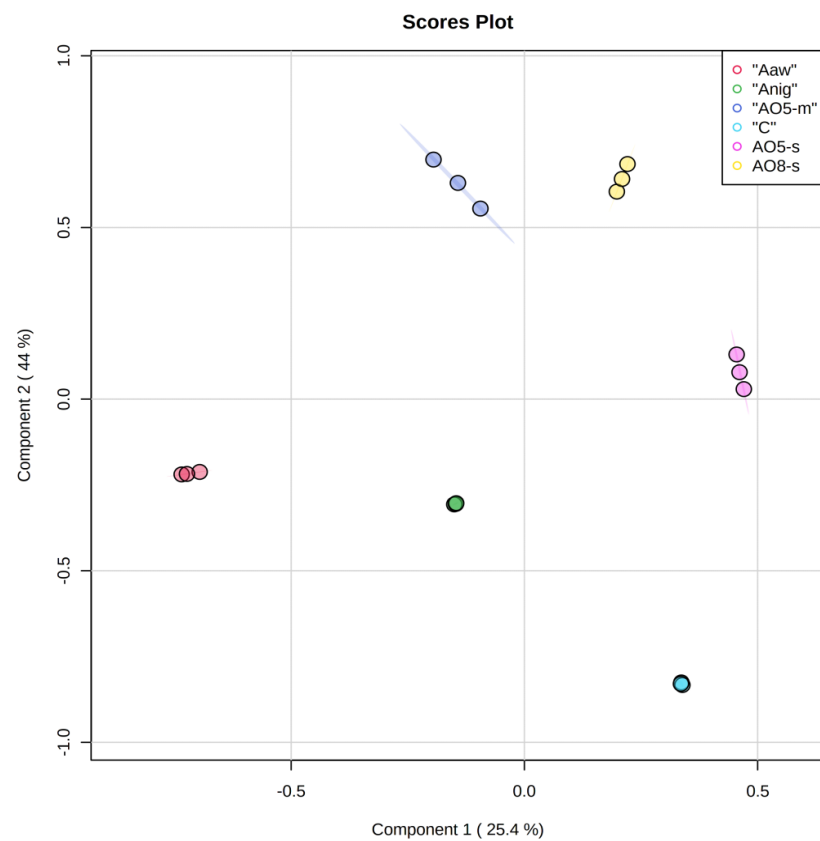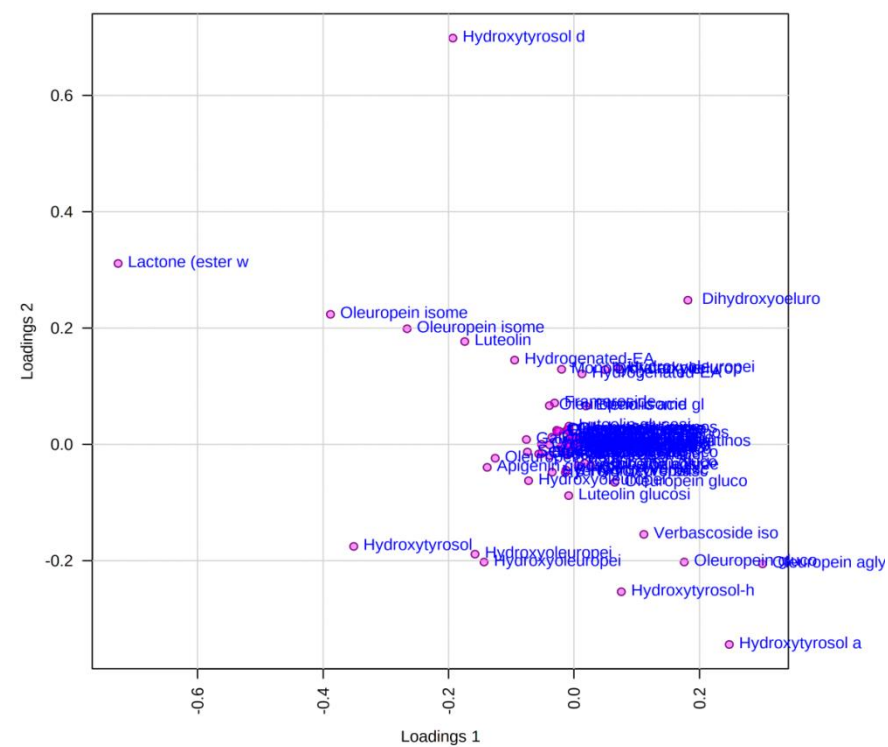

Supplement: s1 [file s1]
